# Supplementary material
Source: publisher figshare collection journal article supplement (https://rs.figshare.com/ndownloader/files/14049152)
Supplement: Supplementary file 1 [file 14049152]

## SUPPLEMENTARY INFORMATION

### Model morphology of *Diaphanoeca grandis*

To prepare the geometry of *D. grandis* for CFD simulations, we use data collated from six individuals that are viewed from the side [6]. We assume that the cell surface and the outline of the lorica have rotational symmetry about the longitudinal axis. In polar spherical coordinates, the cell and the outline of the lorica are described as:

$$R(\theta) = R_0(1 + \alpha_1 \cos \theta + \alpha_2 \cos 2\theta + \alpha_3 \cos 3\theta) \quad (\text{S1})$$

where  $\theta$  is the polar angle, and  $R_0$ ,  $\alpha_1$ ,  $\alpha_2$  and  $\alpha_3$  are shape parameters. Table S1 describes the shape parameters used for the cell and the lorica dome. The centerline of a single microvillus with circular cross-section of radius  $0.075 \mu\text{m}$  is described as:

$$R_F(\theta) = R_C(\theta_C) + [R_L(\theta_L) - R_C(\theta_C)] \frac{\theta - \theta_C}{\theta_L - \theta_C} \quad (\text{S2})$$

where  $\theta_L = 25 \text{ deg}$  and  $\theta_C = 76 \text{ deg}$  are angles where the microvillus connects to the cell and the lorica, respectively. This microvillus is then copied in a circular pattern to obtain 50 evenly distributed microvilli to construct the collar filter.

| case   | $R_0 (\mu\text{m})$ | $\alpha_1$ | $\alpha_2$ | $\alpha_3$ |
|--------|---------------------|------------|------------|------------|
| Cell   | 2.8                 | -0.24      | 0.10       | -0.10      |
| Lorica | 8.1                 | 0.15       | 0.05       | 0.00       |

TABLE S1: Average morphology parameters used to describe the cell and outline of the lorica

### Movies

Movie S1 shows a video recording of freely swimming individual of *D. grandis*. Movies S2 and S3 show the CFD simulation of the freely swimming *D. grandis* with and without its lorica, respectively.
